# Supplementary material
Source: ML conference proceedings conference paper supplement (https://openaccess.thecvf.com/content/WACV2021/html/Wang_How_to_Make_WACV_2021_paper.html)
Supplement: Supplementary file 1 [file Wang_How_to_Make_WACV_2021_supplemental.zip]

## A. YouCookQA dataset

In this section, we introduce the detail of how our question-answer (QA) pairs and alternative choices are collected, together with some examples in our dataset. Then, we show some more statistics of the dataset.

**QA collection** For the first step of collection, the workers at Amazon Mechanical Turk (AMT) are asked to propose one question of specified type about the video, and provide an answer according to the video content. By proposing the correct answers together with questions, we want to make sure that the questions are answerable by watching the video, rather than collecting arbitrary unsolvable questions. Each of the six categories of questions are collected separately to ensure that each video can have at least one QA pair for each category. Specifically for the “multi-hop” category, which is a more general one that may overlap with other types of questions, we design a check-box interface for workers to decide which specific type(s) the QA pairs belong to, as a result which, some questions are tagged by multiple categories.

**QA demonstration** In Tab. 1, we show a representative QA pair for each category. We bold the keywords to illustrate why a specific QA pair is categorized as that type. E.g., in “time” category, the question requests for comparing the speed, which is related to time; In “multi-hop” category, we have multiple steps of reasoning (two bold words). Also, the demo QA pair for “multi-hop” category is marked as “order” category because it has “last/before” keywords which are related to order information.

**Alternative collection** After the QA pairs being collected, we collect additional alternatives to compose multiple choice questions. Human workers are asked to annotate alternatives and clean the multiple choice QA following the three rules: 1) The alternatives need to be related to the question; 2) The alternatives need to have different meanings from the correct answer; 3) If the correct answer is not reasonable or too subjective for a machine to answer, edit the answer or delete the QA. Through this step, the QA pairs collected in the first step are double-checked. Alternatives for “how many” questions are generated randomly with integers ranging from 0 to 10 except for the correct answer, and those for “when” questions are random numbers within the range of  $[0, A_{Correct} - 50] \cup [A_{Correct} + 50, 600]$ , where  $A_{Correct}$  is the number in the correct answer. If  $A_{Correct}$  is less than 50, then we just keep the right interval of the range, or if  $A_{Correct}$  is greater than 550, we keep the left one. 600 is set as a heuristic upper bound of the answers to “when” questions in our dataset, since 95.8% of the videos in our dataset is less than 600 seconds.

**Extra statistics** In Table. 2, we collect the total number of QA pairs, and statistics for four tags of different answer formats. Also, in 3, we show the statistics of QA pairs per video, number of categories per QA pair, and average an-

Table 1: Demonstration of QA pairs of six different categories. YTID stands for YouTube ID. The bold words are the keywords by which the questions are treated as specific categories. Correct answers of the multiple choice questions are given as marked with ✓.

| Categories | YTID        | Examples                                                                                                                                                           |
|------------|-------------|--------------------------------------------------------------------------------------------------------------------------------------------------------------------|
| Count      | GLd3aX16zBg | Q) <b>How many</b> pieces is the sandwich cut into?<br>A) 6.<br>B) 1.<br>C) 2.✓<br>D) 4.<br>E) 3.                                                                  |
| Order      | XOwypmUT5cc | Q) Which ingredient is added <b>first</b> ?<br>A) Sesame seeds.✓<br>B) Tomatoes.<br>C) Garlic.<br>D) Marinara sauce.<br>E) Alfredo sauce.                          |
| Taste      | pOWe4zB-E-4 | Q) Is the masala dosa <b>spicy</b> ?<br>A) 423.<br>B) No.<br>C) 273.<br>D) 308.<br>E) Yes.✓                                                                        |
| Time       | K6Uk5vNi1_Q | Q) Is salt added <b>faster</b> the first or second time?<br>A) The first time<br>B) The fifth time.<br>C) Not added.<br>D) The sixth time.<br>E) The second time.✓ |
| Multi-hop  | xHr8X2Wpmno | Q) Is salt the <b>last</b> ingredient to be added to the bowl <b>before</b> lettuce is chopped?<br>A) 45.<br>B) Tahini.<br>C) Yes.<br>D) No.✓<br>E) 157.           |
| Property   | Gs3OGfQbPjc | Q) What <b>color</b> are the onion rings after being fried?<br>A) Green.<br>B) Brown.✓<br>C) Red.<br>D) Gray.<br>E) Black.                                         |

Table 2: Statistics for each QA type

|                  | <b>Total</b> | <b>Yes/No</b> | <b>Num</b> | <b>Single</b> | <b>Text</b> |
|------------------|--------------|---------------|------------|---------------|-------------|
| <b>Total</b>     | 15355        | 3241          | 6188       | 1501          | 4425        |
| <b>Count</b>     | 3980         | 550           | 3065       | 189           | 174         |
| <b>Order</b>     | 3260         | 653           | 348        | 495           | 1761        |
| <b>Taste</b>     | 2000         | 1574          | 11         | 92            | 322         |
| <b>Time</b>      | 2950         | 29            | 2885       | 3             | 31          |
| <b>Multi-hop</b> | 7200         | 868           | 2363       | 1349          | 2612        |
| <b>Property</b>  | 3267         | 411           | 84         | 716           | 2052        |

Table 3: Statistics for each QA type

|                  | <b>QA/video</b> | <b>Tags/QA</b> | <b>Ans avg len</b> |
|------------------|-----------------|----------------|--------------------|
| <b>Count</b>     | 1.990           | 1.625          | 1.187              |
| <b>Order</b>     | 1.630           | 1.490          | 3.925              |
| <b>Taste</b>     | 1.000           | 1.003          | 2.039              |
| <b>Time</b>      | 1.475           | 1.403          | 1.074              |
| <b>Multi-hop</b> | 3.600           | 2.021          | 2.130              |
| <b>Property</b>  | 1.634           | 2.016          | 3.047              |

swer length (by number of words in the answer) with respect to six different QA categories.

## B. Human quiz setup

Apart from using deep learning models to complete VideoQA tasks, we also invite ten human annotators to perform human test. The participants are asked to imitate the procedure of training and testing of a neural network. A general picture is that each person is given a batch of 300 QA pairs selected from the training set for reference. Afterwards, they will take a quiz of 30 QA pairs from the test set. The QA pairs for both training and testing are randomly sampled according to the distribution of 6 question tags. The main difference between human beings and machines is that human beings can make use of their powerful common sense to complete the task. In detail, the game consists of three steps.

**Common sense** The first step is called “Common sense”. The participants need to answer the multiple-choice questions without watching the videos. The training set is purely QA pairs without video, where participants can explore answer patterns. Also, random guess and common sense are used in this step.

**Visual only** In this step, muted videos are available to participants as visual information. This is because in our baseline models, only visual features are used. The participants will complete the same 30 multiple-choice questions again.

**Visual&Audio (CC)** Now, audio is turned on. Transcripts (CC) are allowed in case the audio is not clear enough. The main reason why we do not use audio in other models is that the audio tracks of all the cooking videos are mainly

speeches, which are already converted to CC. Also, the collection of our dataset does not involve audio information, so our dataset does not contain any questions involving sounds made by utensils or ingredients. Again, under this setting, the participants will redo the quiz.

Finally, all three sets of answers for the three steps are collected and analyzed together with results from the deep learning models. In Tab. 4, we list the detailed accuracy scores of the human quiz.

## C. Full results

In Tab. 5, 6, we show all the experiment results, part of which are omitted in the main body of the paper. Apart from multiple choice accuracy, K-Space is another evaluation metric for our dataset, where a MLP with  $K$  output neurons is tasked to predict the correct answer by using Eq. 2:  $A^* = \arg \max_{j=1,\dots,K} g_j(v, q)$ .

## D. Visualization

In our attached video, we show several example results on different models, and make the comparison among the results. Detailed analysis is provided in the video.

Table 4: Human quiz accuracy scores.

| Quiz steps        | Count | Order | Taste | Time  | Multi-hop | Property | Total |
|-------------------|-------|-------|-------|-------|-----------|----------|-------|
| Common sense      | 0.535 | 0.432 | 0.654 | 0.485 | 0.511     | 0.588    | 0.528 |
| Visual only       | 0.973 | 0.975 | 0.936 | 0.990 | 0.988     | 0.982    | 0.970 |
| Visual&Audio (CC) | 0.973 | 0.975 | 0.966 | 0.990 | 0.988     | 0.982    | 0.977 |

Table 5: Multiple choice accuracy scores.

| Models    | Modalities  | Count | Order | Taste | Time  | Multi-hop | Property | Total |
|-----------|-------------|-------|-------|-------|-------|-----------|----------|-------|
| Baselines | Bare QA     | 0.435 | 0.321 | 0.466 | 0.239 | 0.292     | 0.438    | 0.348 |
|           | Naïve RNN   | 0.434 | 0.330 | 0.467 | 0.234 | 0.283     | 0.449    | 0.347 |
|           | MAC         | 0.438 | 0.331 | 0.462 | 0.229 | 0.294     | 0.437    | 0.348 |
| SEQ       | Visual      | 0.452 | 0.337 | 0.476 | 0.230 | 0.288     | 0.449    | 0.352 |
|           | Description | 0.453 | 0.350 | 0.463 | 0.244 | 0.285     | 0.443    | 0.353 |
|           | Transcript  | 0.454 | 0.320 | 0.469 | 0.227 | 0.286     | 0.438    | 0.347 |
|           | V+CC        | 0.450 | 0.328 | 0.468 | 0.241 | 0.293     | 0.432    | 0.351 |
|           | V+D         | 0.450 | 0.328 | 0.468 | 0.241 | 0.293     | 0.432    | 0.351 |
| SEQ-SA    | Visual      | 0.455 | 0.337 | 0.465 | 0.238 | 0.298     | 0.447    | 0.355 |
|           | Description | 0.449 | 0.334 | 0.473 | 0.231 | 0.286     | 0.419    | 0.347 |
|           | Transcript  | 0.450 | 0.331 | 0.472 | 0.241 | 0.299     | 0.453    | 0.357 |
|           | V+CC        | 0.448 | 0.337 | 0.471 | 0.241 | 0.306     | 0.461    | 0.361 |
|           | V+D         | 0.448 | 0.337 | 0.471 | 0.241 | 0.306     | 0.461    | 0.361 |
| GCN       | Visual      | 0.452 | 0.341 | 0.464 | 0.224 | 0.282     | 0.427    | 0.346 |
|           | Description | 0.452 | 0.331 | 0.475 | 0.229 | 0.290     | 0.447    | 0.352 |
|           | Transcript  | 0.451 | 0.337 | 0.470 | 0.251 | 0.282     | 0.416    | 0.348 |
|           | V+CC        | 0.449 | 0.317 | 0.475 | 0.223 | 0.287     | 0.455    | 0.349 |
|           | V+D         | 0.449 | 0.317 | 0.475 | 0.223 | 0.287     | 0.455    | 0.349 |
| GCN-SA    | Visual      | 0.477 | 0.343 | 0.487 | 0.229 | 0.311     | 0.446    | 0.365 |
|           | Description | 0.449 | 0.334 | 0.473 | 0.231 | 0.286     | 0.419    | 0.347 |
|           | Transcript  | 0.521 | 0.374 | 0.469 | 0.245 | 0.310     | 0.449    | 0.375 |
|           | V+CC        | 0.516 | 0.383 | 0.481 | 0.280 | 0.309     | 0.461    | 0.383 |
|           | V+D         | 0.516 | 0.383 | 0.481 | 0.280 | 0.309     | 0.461    | 0.383 |
| RGCN      | Visual      | 0.522 | 0.371 | 0.478 | 0.277 | 0.329     | 0.490    | 0.392 |
|           | Description | 0.514 | 0.370 | 0.482 | 0.274 | 0.314     | 0.483    | 0.385 |
|           | Transcript  | 0.496 | 0.348 | 0.473 | 0.240 | 0.298     | 0.466    | 0.361 |
|           | V+CC        | 0.518 | 0.350 | 0.480 | 0.269 | 0.325     | 0.493    | 0.390 |
|           | V+D         | 0.536 | 0.399 | 0.497 | 0.286 | 0.334     | 0.513    | 0.413 |
| RGCN-SA   | Visual      | 0.513 | 0.388 | 0.483 | 0.289 | 0.336     | 0.498    | 0.403 |
|           | Description | 0.516 | 0.379 | 0.483 | 0.286 | 0.313     | 0.493    | 0.389 |
|           | Transcript  | 0.484 | 0.343 | 0.469 | 0.243 | 0.319     | 0.485    | 0.366 |
|           | V+CC        | 0.516 | 0.373 | 0.471 | 0.271 | 0.326     | 0.497    | 0.393 |
|           | V+D         | 0.523 | 0.398 | 0.494 | 0.286 | 0.337     | 0.516    | 0.416 |

Table 6: K-Space accuracy scores.

| Models    | Modalities  | Count | Order | Taste | Time  | Multi-hop | Property | Total |
|-----------|-------------|-------|-------|-------|-------|-----------|----------|-------|
| Baselines | Bare QA     | 0.183 | 0.132 | 0.153 | 0.111 | 0.103     | 0.183    | 0.141 |
|           | Naive RNN   | 0.189 | 0.135 | 0.155 | 0.109 | 0.102     | 0.188    | 0.145 |
|           | MAC         | 0.172 | 0.124 | 0.149 | 0.103 | 0.097     | 0.180    | 0.138 |
| SEQ       | Visual      | 0.190 | 0.152 | 0.173 | 0.133 | 0.124     | 0.193    | 0.160 |
|           | Description | 0.201 | 0.151 | 0.165 | 0.124 | 0.117     | 0.199    | 0.158 |
|           | Transcript  | 0.188 | 0.147 | 0.172 | 0.126 | 0.119     | 0.200    | 0.159 |
|           | V+CC        | 0.193 | 0.143 | 0.173 | 0.124 | 0.123     | 0.193    | 0.151 |
|           | V+D         | 0.194 | 0.149 | 0.168 | 0.137 | 0.124     | 0.199    | 0.160 |
| SEQ-SA    | Visual      | 0.206 | 0.153 | 0.175 | 0.121 | 0.127     | 0.204    | 0.164 |
|           | Description | 0.187 | 0.147 | 0.178 | 0.129 | 0.117     | 0.177    | 0.156 |
|           | Transcript  | 0.183 | 0.150 | 0.166 | 0.122 | 0.111     | 0.183    | 0.152 |
|           | V+CC        | 0.191 | 0.160 | 0.173 | 0.132 | 0.127     | 0.197    | 0.167 |
|           | V+D         | 0.204 | 0.163 | 0.184 | 0.143 | 0.133     | 0.198    | 0.173 |
| GCN       | Visual      | 0.184 | 0.144 | 0.169 | 0.126 | 0.120     | 0.188    | 0.150 |
|           | Description | 0.196 | 0.152 | 0.165 | 0.124 | 0.127     | 0.201    | 0.157 |
|           | Transcript  | 0.176 | 0.131 | 0.156 | 0.115 | 0.113     | 0.187    | 0.143 |
|           | V+CC        | 0.187 | 0.141 | 0.167 | 0.128 | 0.110     | 0.177    | 0.150 |
|           | V+D         | 0.183 | 0.136 | 0.154 | 0.115 | 0.108     | 0.186    | 0.148 |
| GCN-SA    | Visual      | 0.196 | 0.155 | 0.176 | 0.134 | 0.124     | 0.199    | 0.164 |
|           | Description | 0.199 | 0.140 | 0.165 | 0.126 | 0.112     | 0.193    | 0.153 |
|           | Transcript  | 0.180 | 0.136 | 0.172 | 0.119 | 0.119     | 0.194    | 0.150 |
|           | V+CC        | 0.207 | 0.170 | 0.181 | 0.140 | 0.134     | 0.206    | 0.177 |
|           | V+D         | 0.223 | 0.173 | 0.190 | 0.153 | 0.143     | 0.224    | 0.183 |
| RGCN      | Visual      | 0.216 | 0.168 | 0.193 | 0.145 | 0.134     | 0.223    | 0.179 |
|           | Description | 0.204 | 0.152 | 0.178 | 0.134 | 0.136     | 0.201    | 0.163 |
|           | Transcript  | 0.193 | 0.146 | 0.160 | 0.127 | 0.127     | 0.193    | 0.152 |
|           | V+CC        | 0.205 | 0.159 | 0.186 | 0.143 | 0.136     | 0.203    | 0.173 |
|           | V+D         | 0.213 | 0.180 | 0.204 | 0.160 | 0.151     | 0.227    | 0.194 |
| RGCN-SA   | Visual      | 0.226 | 0.164 | 0.199 | 0.153 | 0.140     | 0.216    | 0.182 |
|           | Description | 0.199 | 0.156 | 0.174 | 0.135 | 0.122     | 0.195    | 0.162 |
|           | Transcript  | 0.183 | 0.134 | 0.153 | 0.110 | 0.107     | 0.197    | 0.144 |
|           | V+CC        | 0.213 | 0.172 | 0.190 | 0.151 | 0.139     | 0.225    | 0.180 |
|           | V+D         | 0.243 | 0.196 | 0.214 | 0.172 | 0.170     | 0.233    | 0.203 |
